# Supplementary material
Source: publisher figshare collection journal article supplement (https://gsajournals.figshare.com/ndownloader/files/13491617)
Supplement: Supplementary file 1 [file 13491617]

## Sheet: ALLhbx1_developmental_genes
AFLA_ID	description	6 h	24 h	48 h
AFLA_001460	deoxyribodipyrimidine photo-lyase Phr1, putative	-0.0849948	0.392571	0.747049
AFLA_006170	polyketide synthetase PksP	-0.275531	-0.517816	-0.788176
AFLA_016140	conidial pigment biosynthesis scytalone dehydratase Arp1	0.386517	2.22547	2.44896
AFLA_017380	conserved hypothetical protein	-0.369451	-0.579373	-1.99748
AFLA_018340	G-protein complex alpha subunit GpaA/FadA	-0.734409	-0.0430862	-0.0450708
AFLA_020210	sexual development transcription factor NsdD	-0.295665	-1.18101	-0.975444
AFLA_025720	C6 transcription factor NosA	-5.37861	-8.60563	-3.24851
AFLA_026790	fatty acid oxygenase PpoA, putative	0.0209947	0.0100417	-1.05546
AFLA_026850	HMG box protein, putative	-0.243313	0.543346	3.69022
AFLA_026900	developmental regulator VosA	0.410522	-0.783128	-0.149724
AFLA_029620	transcription factor AbaA	0.221338	-0.156798	-0.687342
AFLA_030020	G-protein complex gamma subunit Ste18	-0.0930872	0.647328	0.113714
AFLA_030430	fatty acid oxygenase PpoC, putative	-2.64919	-4.83934	-3.44207
AFLA_031380	class V chitinase, putative	0.799492	0.673288	-3.78301
AFLA_033010	3-ketoacyl-acyl carrier protein reductase	0.91558	0.127123	-0.738852
AFLA_034030	trehalose-phosphate synthase/phosphatase complex subunit Tps1	-0.610215	-0.282863	-1.15882
AFLA_037370	regulator of G protein signaling domain protein RgsD	0.331029	-0.796832	-0.267502
AFLA_042780	chitin synthase A	-0.15805	-0.916881	-1.07558
AFLA_045660	multicopper oxidase/laccase, putative	1.51765	-0.883371	-0.8933
AFLA_046990	APSES transcription factor StuA	-1.62823	-2.5412	-1.79524
AFLA_048650	sexual development transcription factor SteA	-0.530058	-1.08547	-0.483949
AFLA_052030	developmental regulatory protein WetA	0.9234	0.770502	1.83666
AFLA_052430	alpha,alpha-trehalase TreB/Nth1	0.134661	-0.00348135	0.72028
AFLA_060730	endosomal sorting complex protein TSG101, putative	-0.65534	-0.358904	-0.0575771
AFLA_061620	a-pheromone receptor PreA	-1.21142	-0.661899	-4.80595
AFLA_065850	sensor histidine kinase/response regulator, putative	-0.386215	-0.558254	-0.467874
AFLA_066460	developmental regulator AflYf / VeA	-0.308105	0.0405718	1.16122
AFLA_079780	G protein complex alpha subunit GanA	0.469717	0.518359	-0.867477
AFLA_080170	MYB family conidiophore development protein FlbD, putative	-1.18991	-2.3671	-3.69073
AFLA_082850	C2H2 type conidiation transcription factor BrlA	0.391684	-2.17902	-2.37438
AFLA_087630	alpha,alpha-trehalose-phosphate synthase subunit, putative	-0.0661334	0.0145647	-0.813843
AFLA_093230	phosducin, putative	0.280801	0.0277733	-1.39531
AFLA_093240	G-protein complex beta subunit SfaD	-0.774812	-0.400155	-0.127242
AFLA_098380	conidial hydrophobin RodA/RolA	4.331	-3.06333	-3.55315
AFLA_101920	extracellular developmental signal biosynthesis protein FluG	1.39548	-0.294812	0.015688
AFLA_103210	mating-type protein MAT alpha 1	0.301373	0.231333	3.25881
AFLA_103610	GATA transcription factor LreA	0.521519	0.112269	-0.240165
AFLA_114760	chitin synthase B	-0.570164	-1.40279	-0.55243
AFLA_124830	hypothetical protein	0.0582452	-4.86247	-1.72248
AFLA_128130	adenylate cyclase AcyA	-0.348125	-0.619719	0.0235839
AFLA_131490	hypothetical protein	-0.398103	-0.597881	-1.73076
AFLA_134030	developmental regulator FlbA	0.310745	-0.298838	-0.627671
AFLA_135680	G protein-coupled receptor GprD	-1.02984	-1.09901	0.188813
AFLA_136410	transcriptional regulator Medusa	0.53731	-0.570773	0.18065
AFLA_137320	C2H2 conidiation transcription factor FlbC	-0.724488	-2.36931	-0.712415
